# Supplementary material
Source: HighWire-hosted journal article supplement (http://www.cmaj.ca/highwire/filestream/58883/field_highwire_adjunct_files/0/five-adhd-1-at.pdf)
Supplement: five-adhd-1-at.pdf [file five-adhd-1-at.pdf]

## Appendix 1: References

1. Froehlich TE, Anixt JS, Loe IM, et al. Update on environmental risk factors for attention-deficit/hyperactivity disorder. *Curr Psychiatry Rep* 2011;13:333-4.
2. Pliszka S; AACAP Work Group on Quality Issues. Practice parameter for the assessment and treatment of children and adolescents with attention-deficit/hyperactivity disorder. *J Am Acad Child Adolesc Psychiatry* 2007;46:894-921.
3. Arnold LE, Lofthouse N, Hurt E. Artificial food colours and attention-deficit/hyperactivity symptoms: conclusions to dye for. *Neurotherapeutics* 2013;DOI:10.1007/s13311-012-0133-x.
4. Goodlad JK, Marcus DK, Fulton JF. Lead and attention-deficit/hyperactivity disorder (ADHD) symptoms: a meta-analysis. *Clin Psych Rev* 2013;33:417-25
5. Morrow RL, Garland EJ, Wright JM, et al. Influence of relative age on diagnosis and treatment of attention-deficit/hyperactivity disorder in children. *CMAJ* 2012;184:755-62.
- 6 Vidal-Estrada R, Bosch-Munso R, Nogueira-Morais M, et al. Psychological treatment of attention deficit hyperactivity disorder in adults: a systematic review. *Actas Esp Psiquiatr* 2012;40:147-54.
7. Sonuga-Barke EJS, Brandeis D, Cortese S, et al. European ADHD Guidelines Group. Nonpharmacological interventions for ADHD: systematic review and meta-analysis of randomized controlled trials of dietary and psychological treatments. *Am J Psychiatry* 2103;170:275-89.
8. Pontifex MB, Silva BJ, Raine LB, et al. Exercise improves behavioural, neurocognitive, and scholastic performance in children with attention-deficit/hyperactivity disorder. *J Pediatr* 2012;162:543-51.
9. Vaughan BS, March JS, Kratochvil CJ. The evidence-based pharmacological treatment of paediatric ADHD. *Int J Neuropsychopharmacol* 2011;15:1-13.
10. Santosh PJ, Sattar S, Canagaratnam M. Efficacy and tolerability of pharmacotherapies for attention-deficit hyperactivity disorder in adults. *CNS Drugs* 2011;25:737-63.
11. Bélanger SA, Warren AE, Hamilton RM, et al. Cardiac risk assessment before the use of stimulant medications in children and youth. *Paediatr Child Health* 2009;14:579-92.
12. Taylor A, Deb S, Unwin G. Scales for the identification of adults with attention deficit hyperactivity disorder (ADHD): a systematic review. *Res Dev Disabil* 2011;32:924-38.
